# Supplementary material for: Zyxin-Siah2–Lats2 axis mediates cooperation between Hippo and TGF-β signalling pathways
Source: PubMed Central journal article supplement (PMC4821889; doi:10.1038/ncomms11123), 2016-03-31
Supplement: ncomms11123-s1.pdf [file ncomms11123-s1.pdf]

## Supplementary Figure 1: Loss of Zyxin stabilizes Lats2 and activates Hippo signalling.

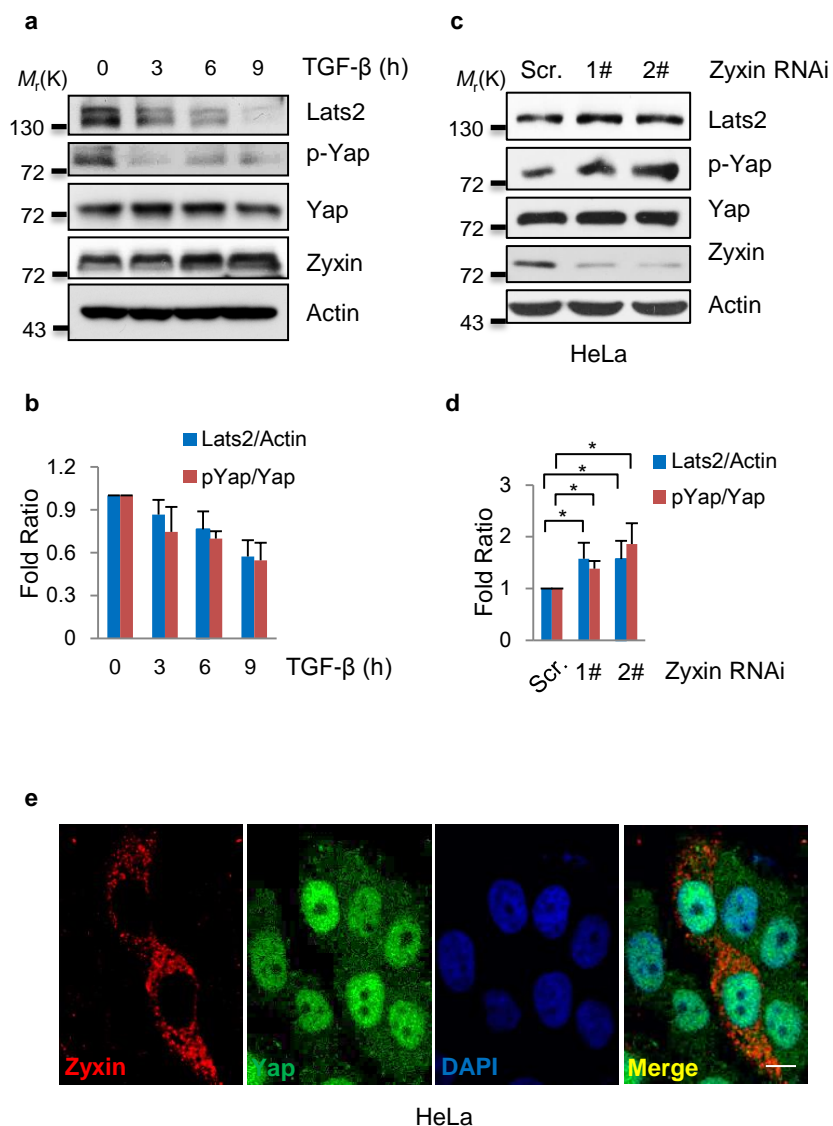

### Supplementary Figure 1: Loss of Zyxin stabilizes Lats2 and activates Hippo Signalling.

(a, b) MDA-MB-231 cells were treated with 5 ng ml<sup>-1</sup> TGF- $\beta$ , collected at indicated the time points and then immunoblotted with the indicated antibodies (a) and quantification of Lats2 (normalized to actin) and p-Yap (normalized to Yap) protein levels (b). Ratio t-test was applied. (c, d) HeLa cells stably expressed shRNA against Zyxin were collected for immunoblotting with indicated antibodies (c) and quantification of Lats2 (normalized to actin) and p-Yap (normalized to Yap) protein levels (d). Ratio t-test was applied. (e) Zyxin-V5 overexpressed HeLa cells were stained with DAPI and antibodies against Yap and V5. Scale bars: 10  $\mu$ m. All error bars indicate s.d.. \*,  $P < 0.05$ .

Supplementary Figure 2: Zyxin potentiates Lats2 degradation.

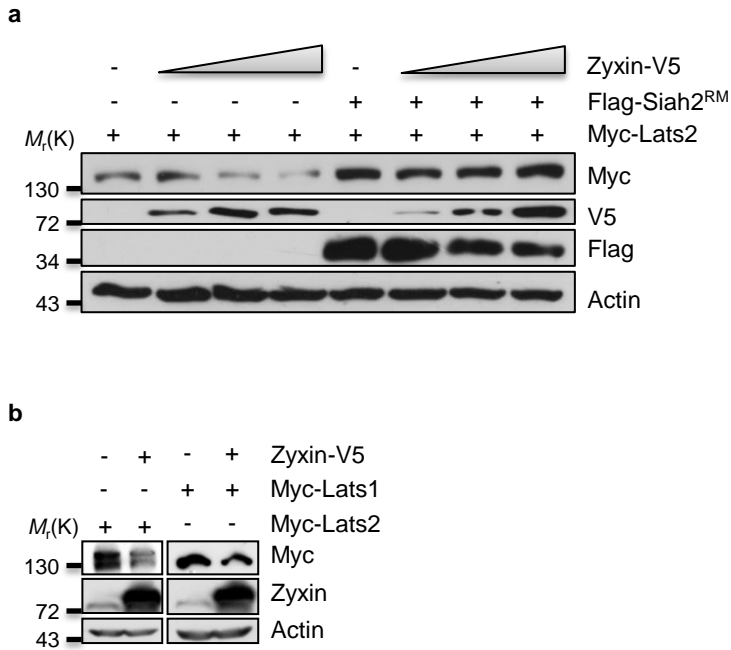

**Supplementary Figure 2: Zyxin potentiates Lats2 degradation in a dosage dependent manner.** (a) Lats2 degradation was dosage-dependent on Zyxin and this effect was blocked by the dominant negative mutant of Siah2. (b) Lats1/2 stability was regulated by Zyxin.

### Supplementary Figure 3: Zyxin facilitates Siah2-Lats2 binding is independent of F-actin cytoskeleton.

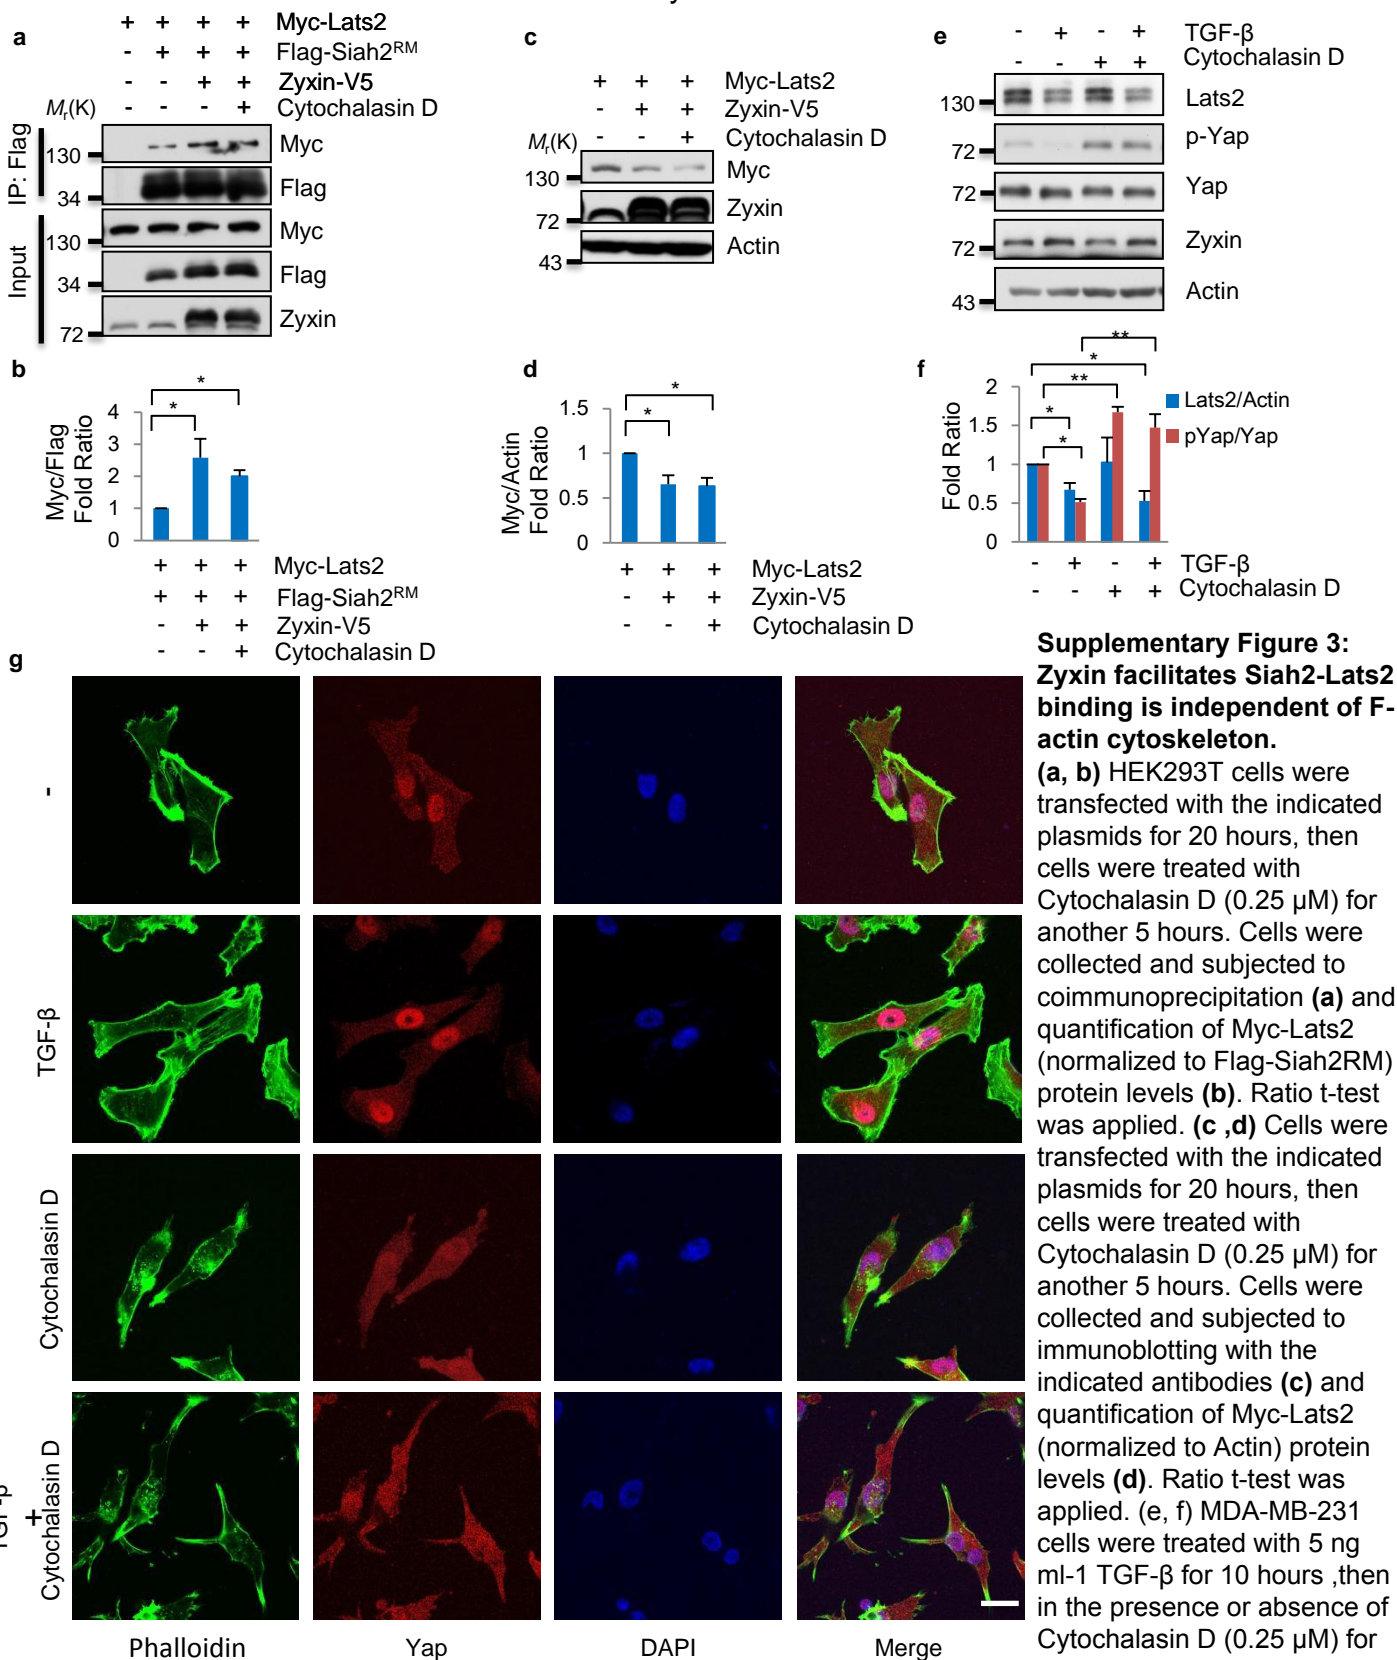

### Supplementary Figure 3: Zyxin facilitates Siah2-Lats2 binding is independent of F-actin cytoskeleton.

**(a, b)** HEK293T cells were transfected with the indicated plasmids for 20 hours, then cells were treated with Cytochalasin D (0.25 μM) for another 5 hours. Cells were collected and subjected to coimmunoprecipitation **(a)** and quantification of Myc-Lats2 (normalized to Flag-Siah2<sup>RM</sup>) protein levels **(b)**. Ratio t-test was applied. **(c, d)** Cells were transfected with the indicated plasmids for 20 hours, then cells were treated with Cytochalasin D (0.25 μM) for another 5 hours. Cells were collected and subjected to immunoblotting with the indicated antibodies **(c)** and quantification of Myc-Lats2 (normalized to Actin) protein levels **(d)**. Ratio t-test was applied. **(e, f)** MDA-MB-231 cells were treated with 5 ng ml<sup>-1</sup> TGF-β for 10 hours, then in the presence or absence of Cytochalasin D (0.25 μM) for another 5 hours. Cells were

collected and subjected to immunoblotting with the indicated antibodies **(e)** and quantification of Lats2 (normalized to actin) and p-Yap (normalized to Yap) protein levels **(f)**. Ratio t-test was applied. **(g)** MDA-MB-231 cells in **(e)** were stained with DAPI, Phalloidin and antibody against Yap. Scale bars: 25 μm. All error bars indicate s.d.. \*, *P* < 0.05; \*\*, *P* < 0.01.

Supplementary Figure 4: Specificity evaluation of anti-Zyxin antibody by IHC analysis.

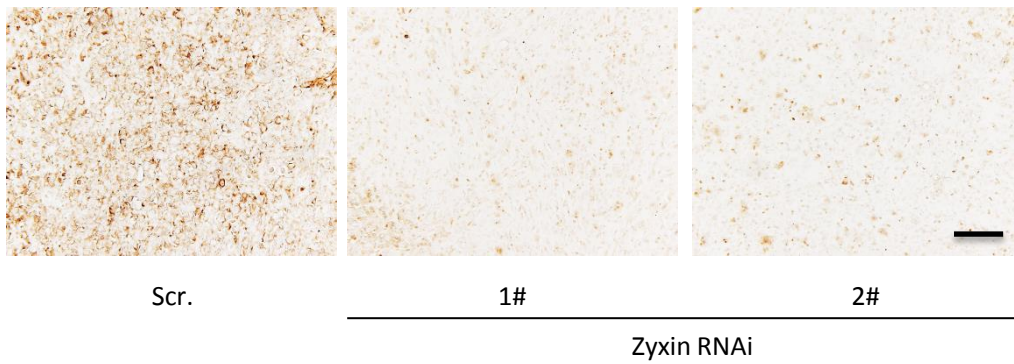

**Supplementary Figure 4: Specificity evaluation of anti-Zyxin antibody by IHC analysis.**

Zyxin knockdown xenograft tumor tissues were used to verify the specificity of Zyxin antibody for IHC. Scale bars: 50  $\mu$ m.

Supplementary Figure 5: Uncropped images of key blots/gels.

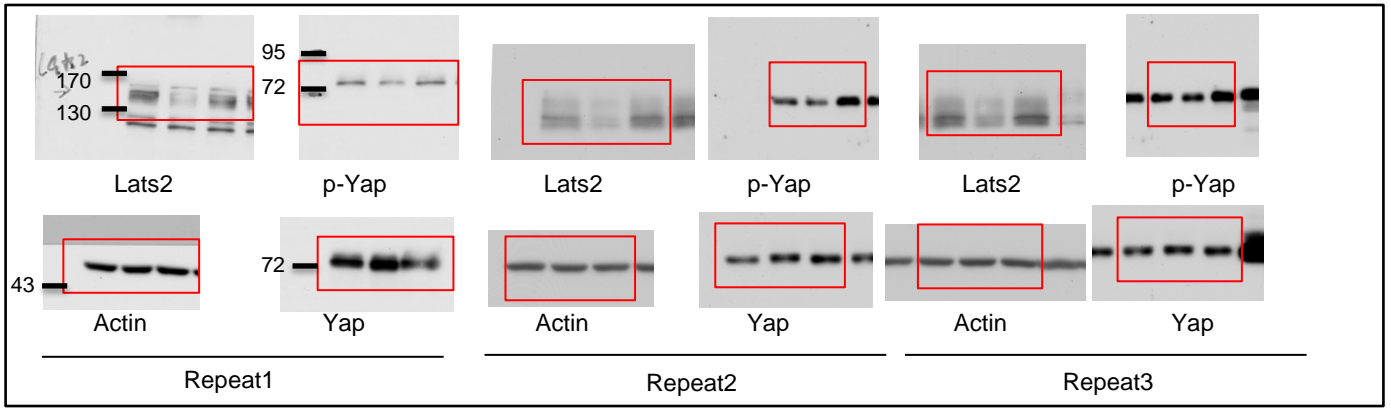

Figure 1c

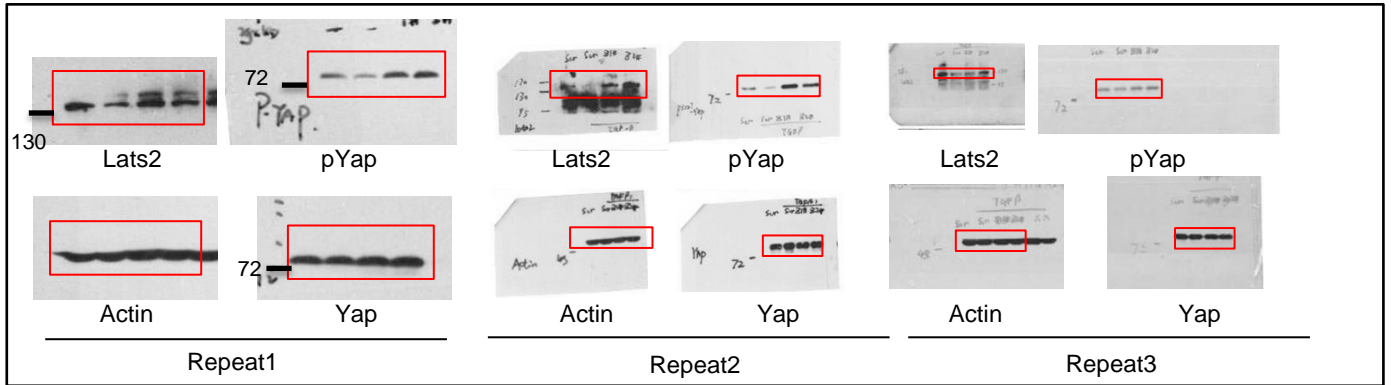

Figure 1e

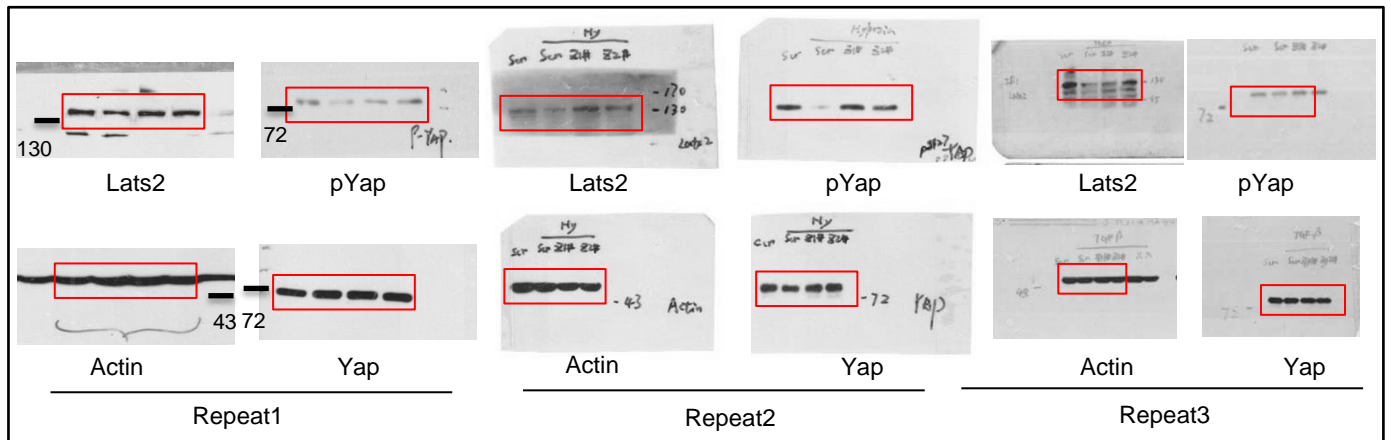

Figure 1h

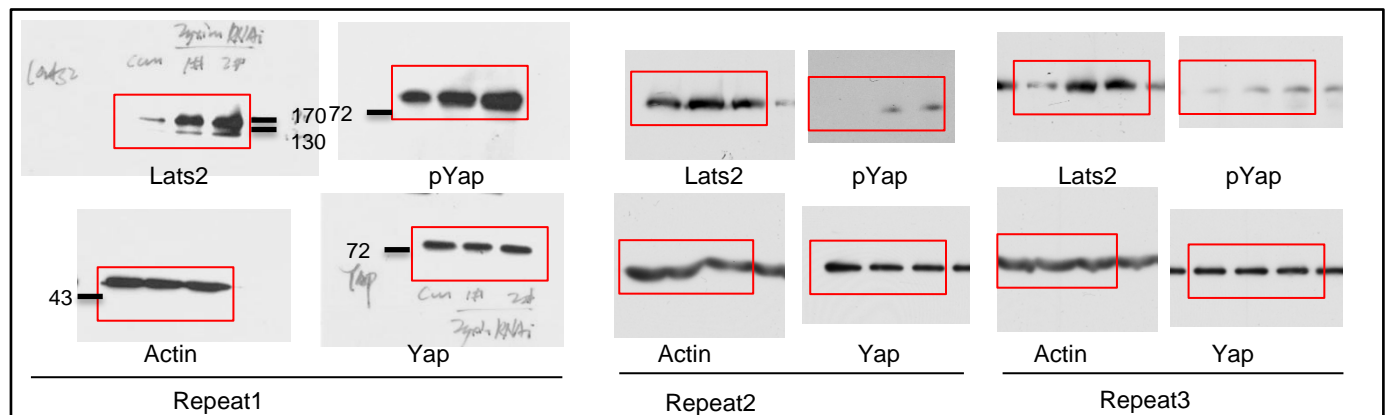

Figure 2a

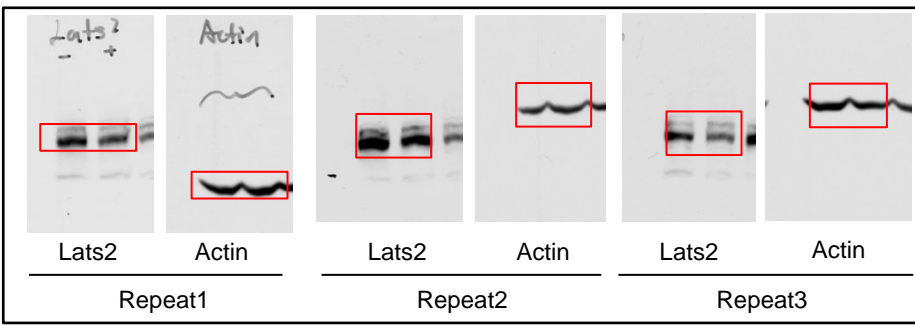

Figure 2c

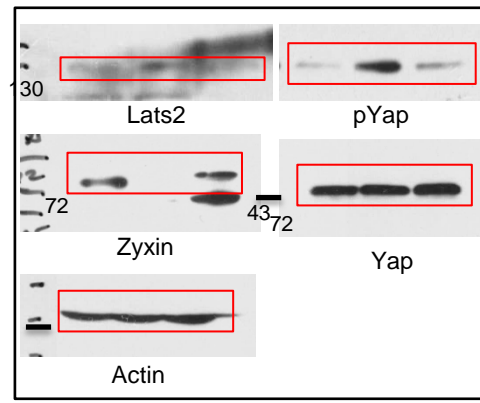

Figure 2e

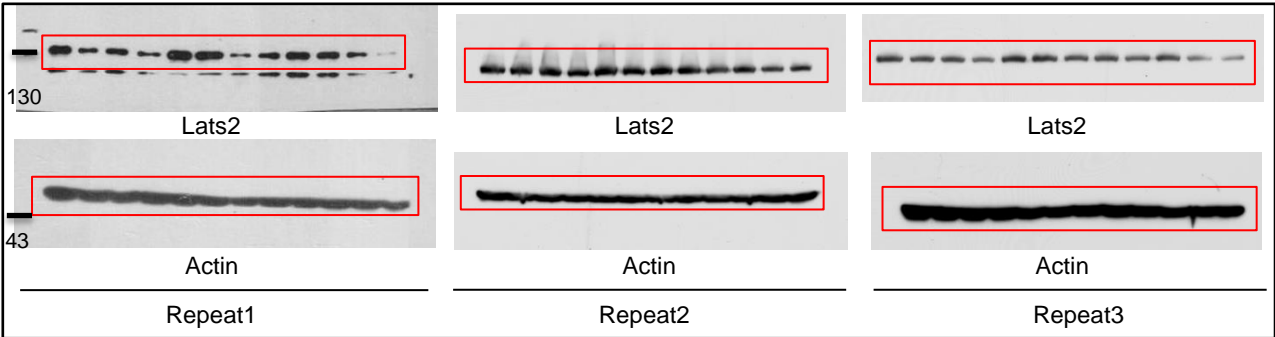

Figure 2f

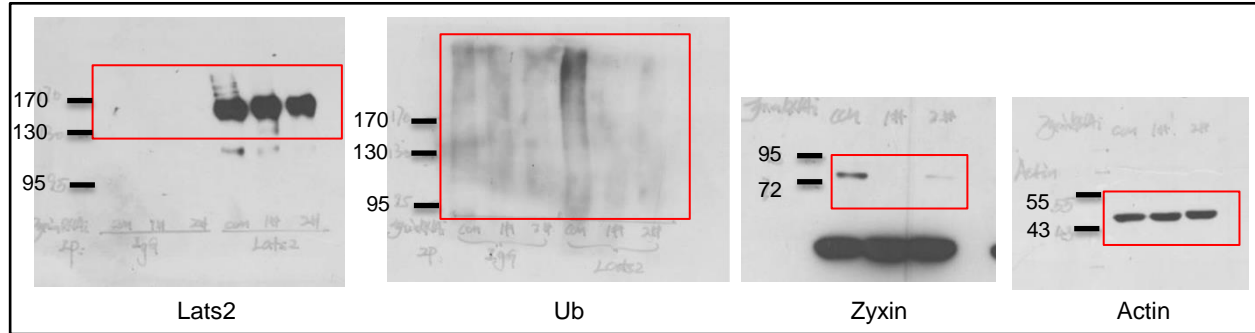

Figure 3a

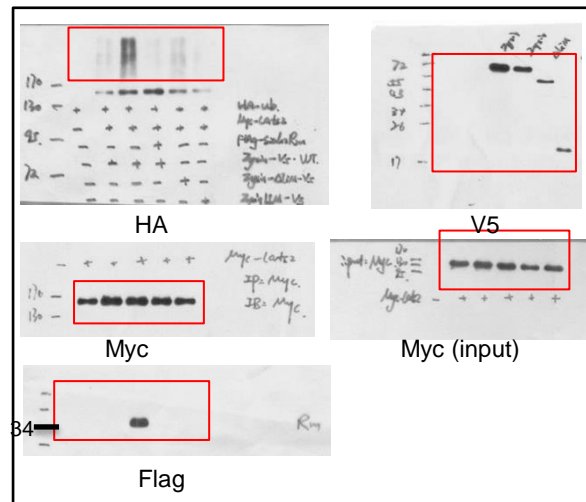

Figure 3b

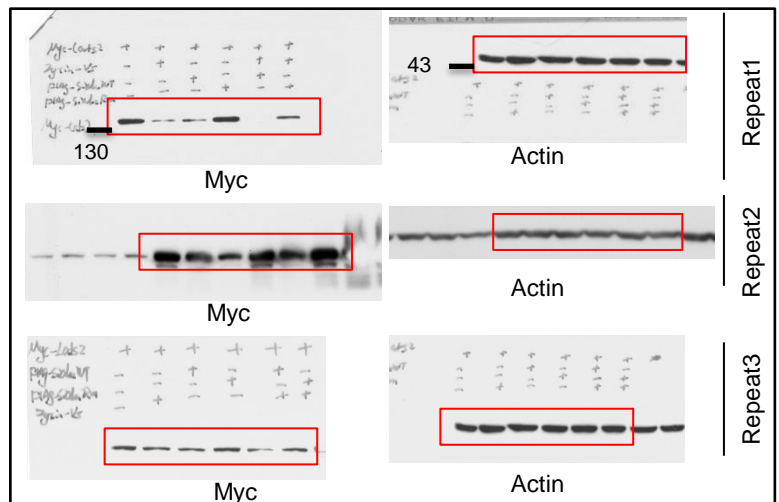

Figure 3c

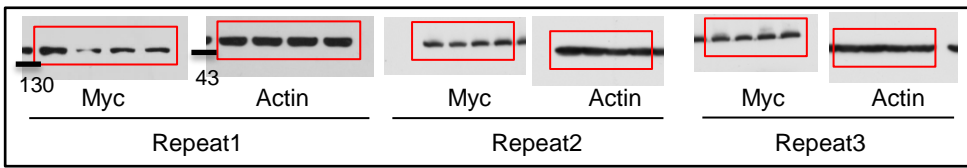

**Figure 3e**

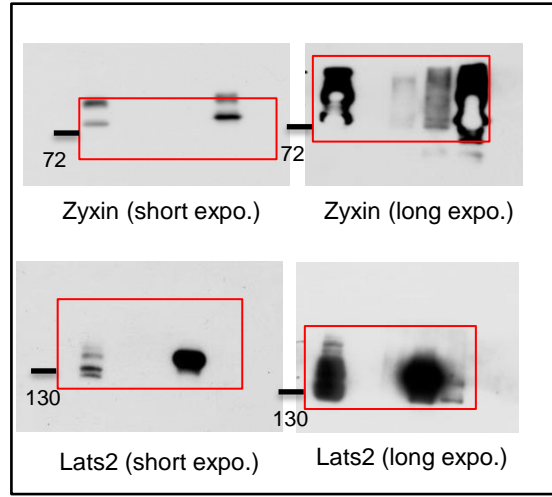

**Figure 4b**

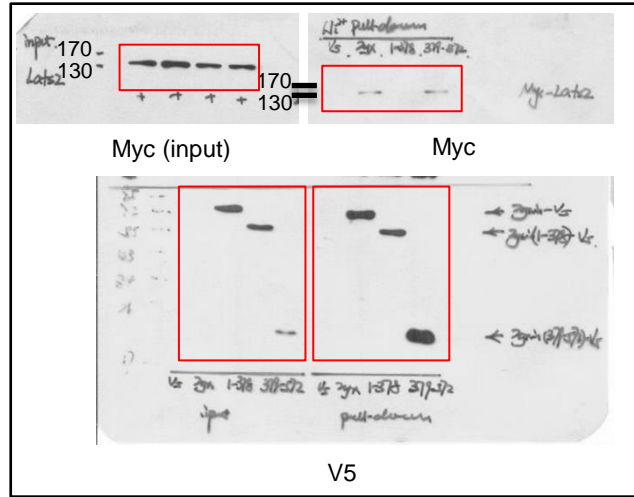

**Figure 4d**

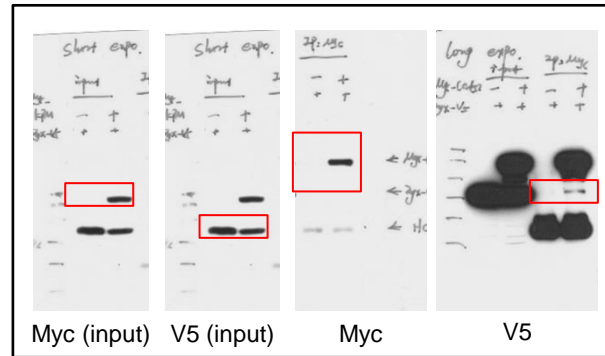

**Figure 4c**

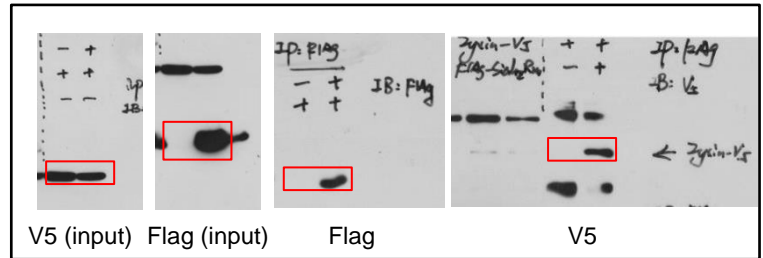

**Figure 4e**

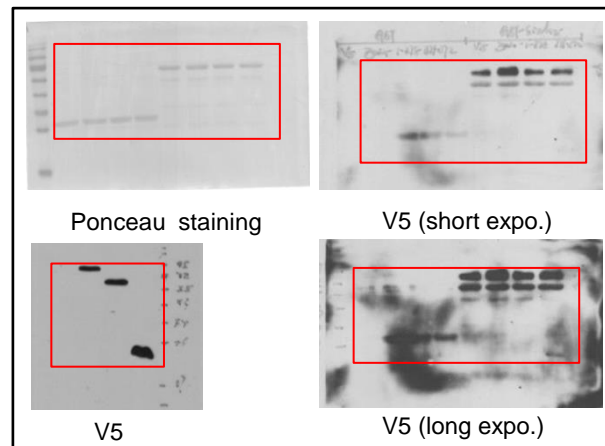

**Figure 4f**

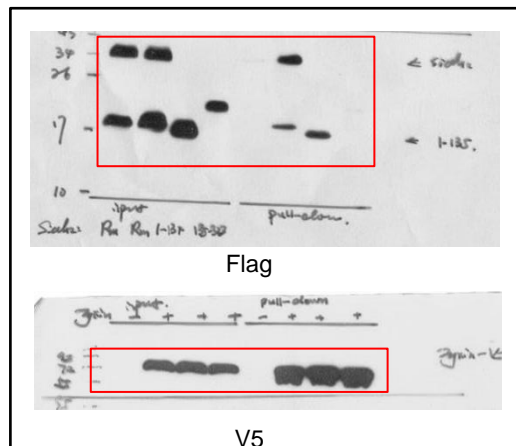

**Figure 4g**

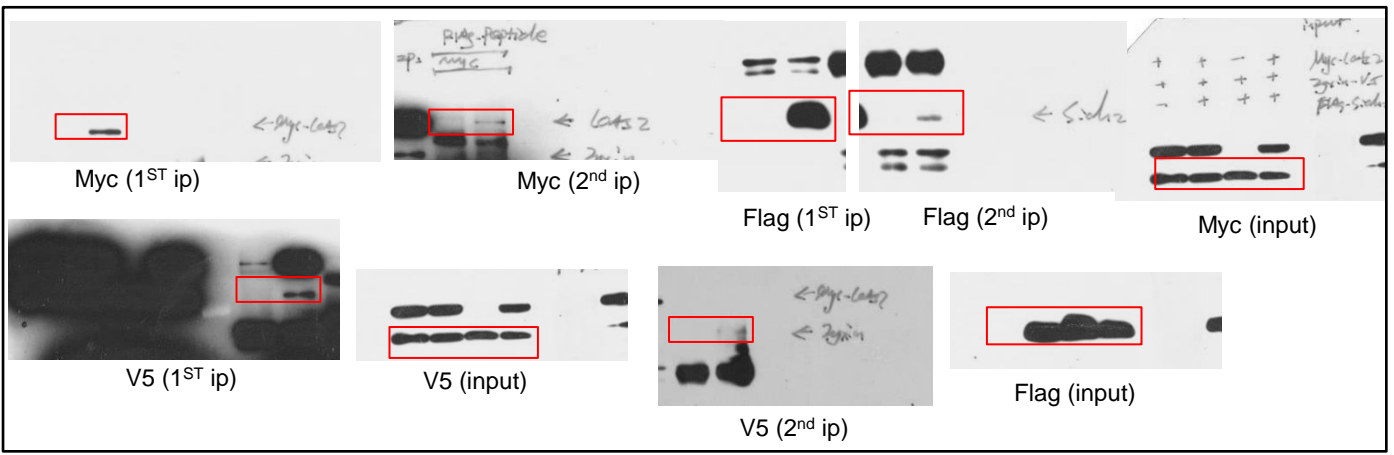

**Figure 5b**

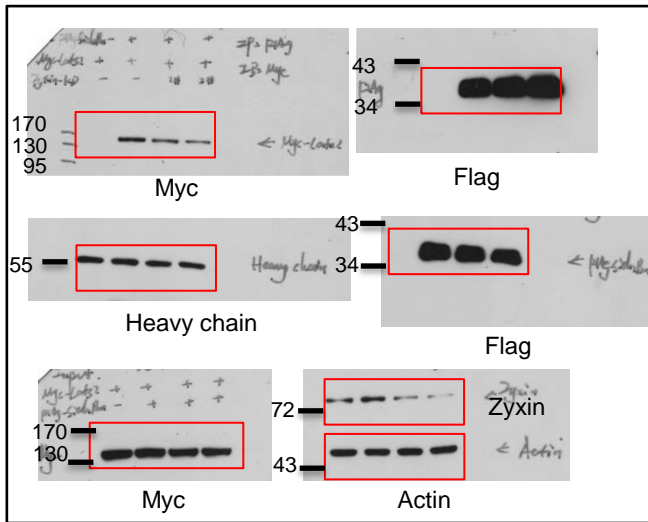

**Figure 5c**

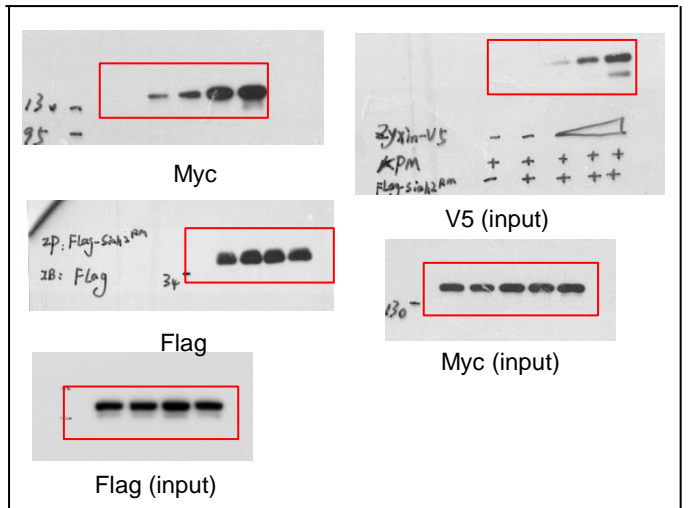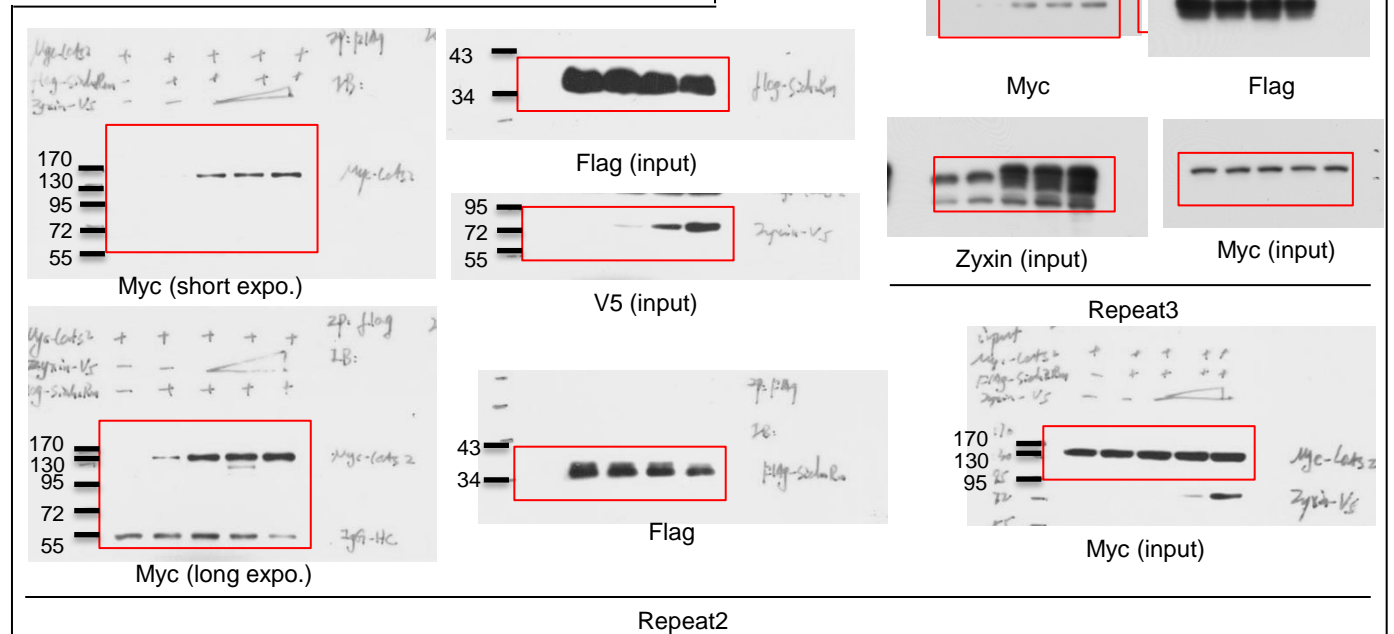

**Figure 5d**



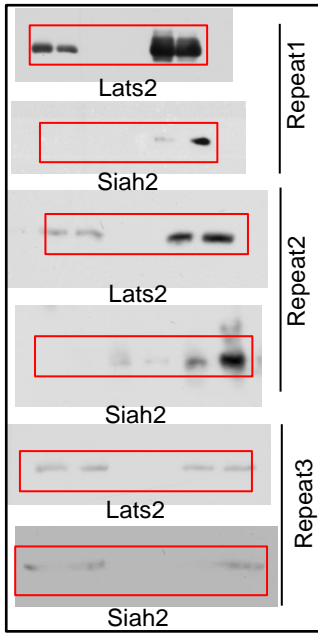

Figure 5f

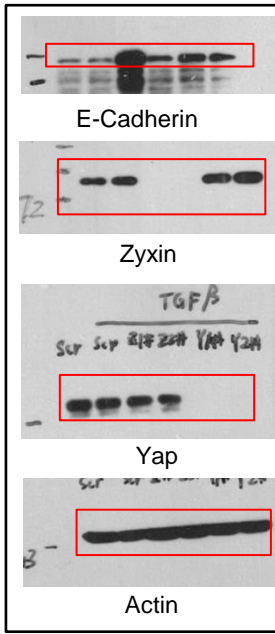

Figure 6b

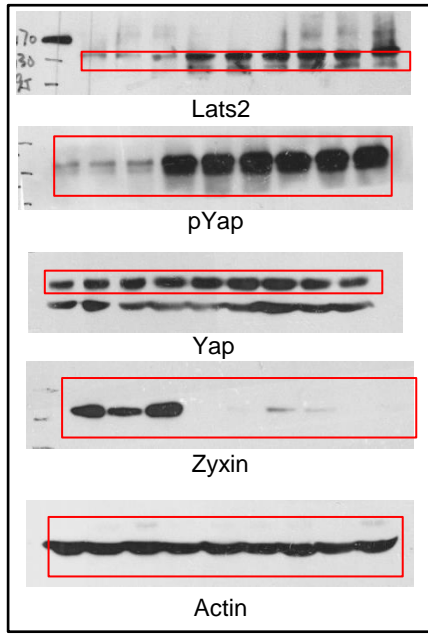

Figure 6i

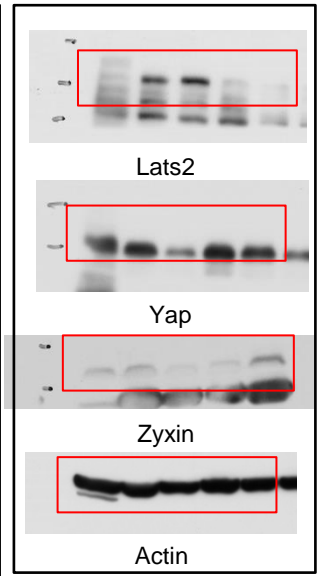

Figure 7a

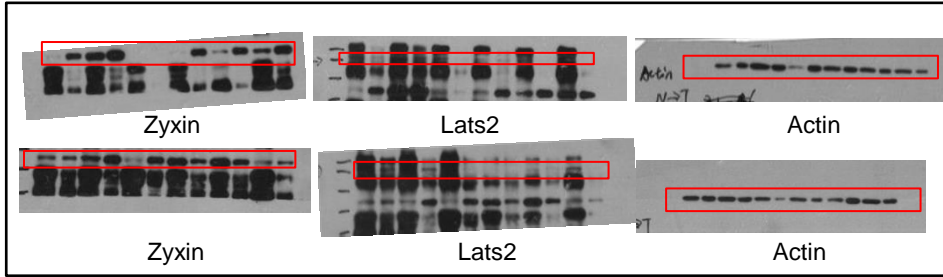

Figure 7b

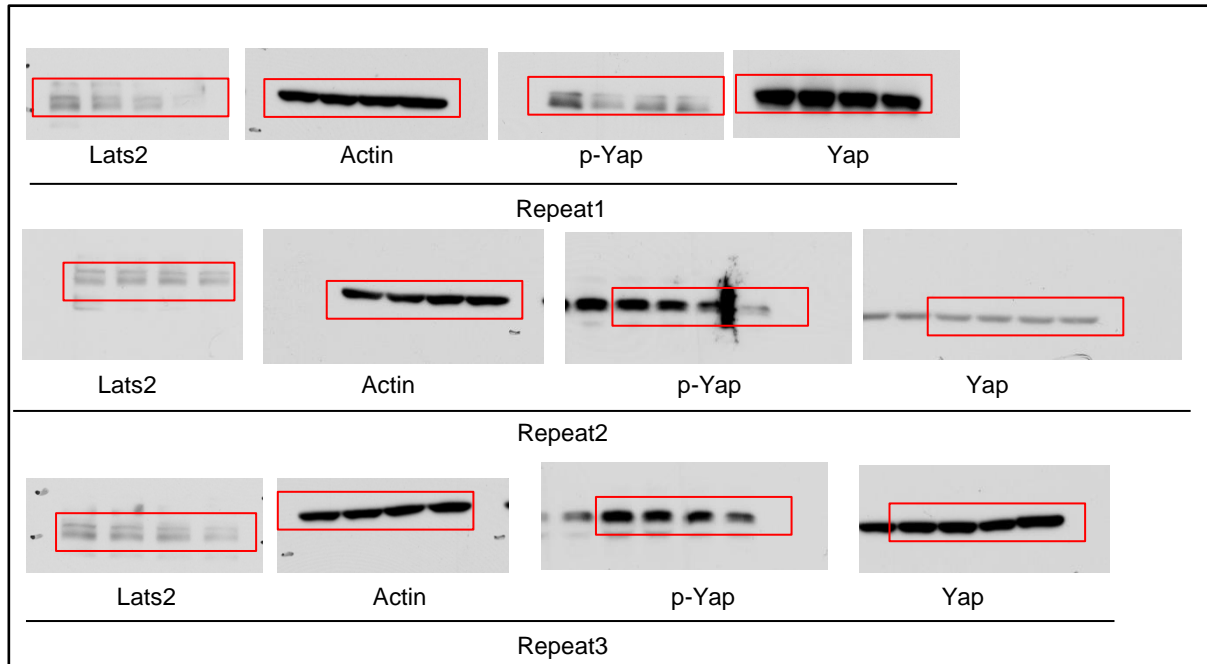

Supplementary Figure 1a

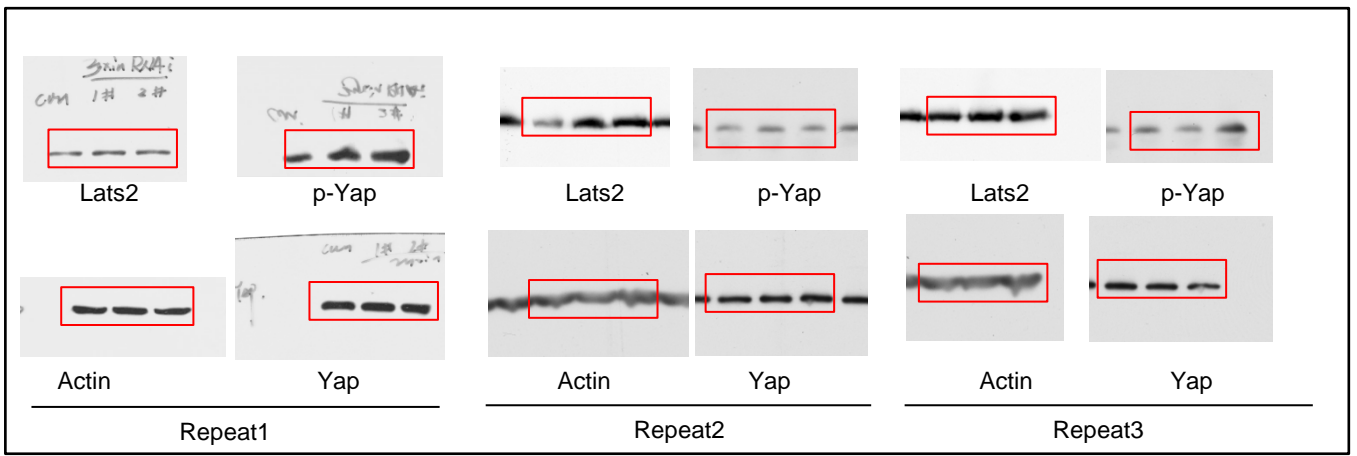

**Supplementary Figure 1c**

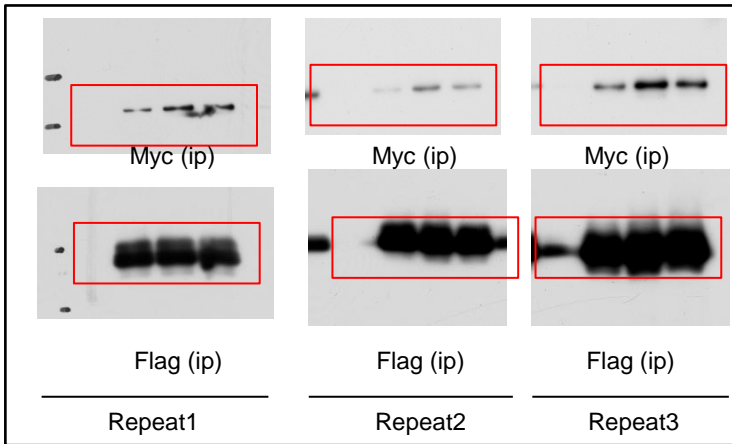

**Supplementary Figure 3a**

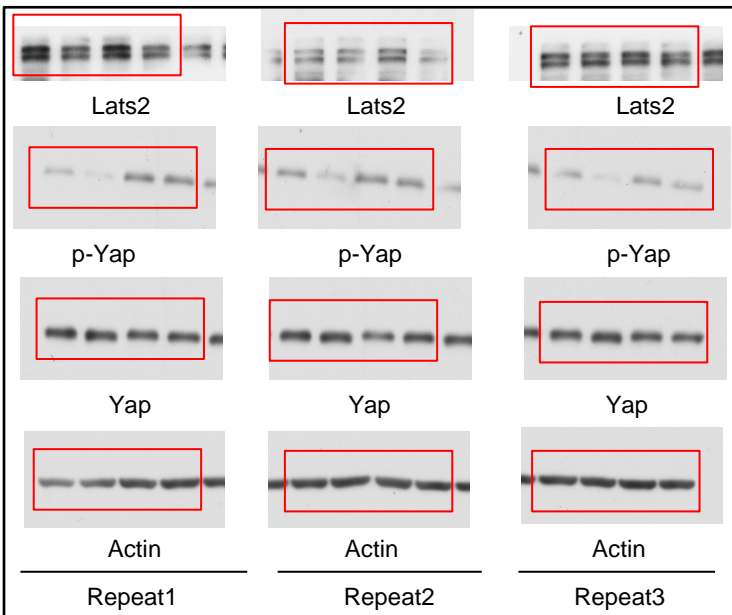

**Supplementary Figure 3c**

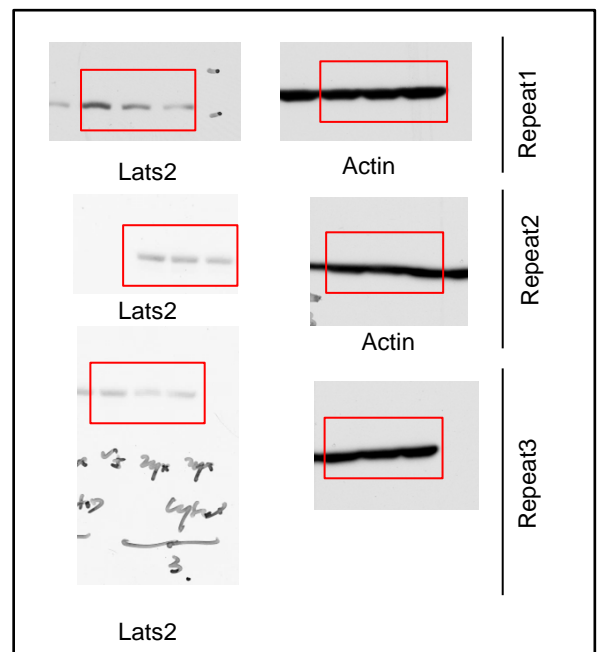

**Supplementary Figure 3b**
